# Supplementary material for: Lesions of mediodorsal thalamic nucleus reverse abnormal firing of the medial prefrontal cortex neurons in parkinsonian rats
Source: PubMed Central journal article supplement — Neural Regen Res. 2019 Sep;14(9):1635–42. doi: 10.4103/1673-5374.255982 (PMC6557112; doi:10.4103/1673-5374.255982), 2019-09
Supplement: NRR-14-1635_Suppl2.pdf [file NRR-14-1635_Suppl2.pdf]

## OPEN PEER REVIEW REPORT 2

**Reviewer:** Jadwiga Szymura, University of Physical Education in Krakow, Poland.

**Comments to the authors:**

Strengths of the article:

The subject of the article is interesting. The manuscript is generally well written and clearly presented.

Weaknesses of the article:

There is no clear definition of the purpose of the study. The Authors did not provide specific and clear conclusions.

This is a good study providing some interesting results. The introduction, methods and results are nicely presented. I think just a couple of points require clarification:

### ABSTRACT

The abstract is well-structured but make the purpose of the study clearly. However, it also lacks context. The conclusions section needs revising for clarity.

### INTRODUCTION

Please clearly define the purpose of the study in the introduction and in the abstract.

### RESULTS

The results section is quite 'wordy' and long-winded - please reduce and improve conciseness.

### CONCLUSIONS

Provide specific and clear conclusions from this study (also in the abstract).

I miss some critical reflection about the research. There are always some strengths and certainly limitations of any study. These should be addressed.
